# Supplementary material for: Safety and Transfer Study: Transfer of Bromoform Present in Asparagopsis taxiformis to Milk and Urine of Lactating Dairy Cows
Source: PubMed Central journal article supplement (PMC7998480; doi:10.3390/foods10030584), 2021-03-10
Supplement: foods-10-00584-s001.pdf [file foods-10-00584-s001.pdf]

**Supplementary Table S1.** Indication on the intake of the seaweed-mix containing *Asparagopsis taxiformis* per animal per day since first offering of the seaweed-mix on day 1.

| Cow             | Treatments |     |     |     |     |    |     |     |                  |                  |                  |                  |
|-----------------|------------|-----|-----|-----|-----|----|-----|-----|------------------|------------------|------------------|------------------|
|                 | Low        |     |     |     |     |    |     |     | Medium           |                  | High             |                  |
|                 | L1         | L2  | L3  | L4  | L5  | L6 | L7  | L8  | M1               | M2               | H1               | H2               |
| Day             |            |     |     |     |     |    |     |     |                  |                  |                  |                  |
| 1               | +          | +   | +   | +   | +   | +  | +   | +   | +                | +                | +/-              | +/-              |
| 2               | +          | -   | +   | +   | +   | +  | +   | +   | +/-              | -                | -                | -                |
| 3               | +          | -   | +   | +   | +   | +  | +   | +   | +/-              | -                | -                | -                |
| 4               | +          | -   | +   | +/- | +   | +  | +   | +/- | +/-              | -                | -                | -                |
| 5               | +          | -   | +   | +/- | +   | +  | +   | +/- | +/-              | -                | -                | -                |
| 6               | +          | -   | +   | +/- | +   | +  | +   | +/- | +/-              | -                | -                | -                |
| 7 <sup>1</sup>  | +          | +/- | +   | +/- | +/- | +  | +/- | +/- | +/-              | +/-              | +/-              | +/-              |
| 8 <sup>1</sup>  | +          | +/- | +   | +/- | +/- | +  | +/- | +/- | +/-              | +/-              | +/-              | +/-              |
| 9 <sup>1</sup>  | +          | +/- | +/- | +/- | +/- | +  | +/- | +/- | +/-              | +/-              | +/-              | +/-              |
| 10 <sup>1</sup> | +          | +/- | +   | +/- | +/- | +  | +/- | +/- | +/- <sup>2</sup> | +/- <sup>2</sup> | +/- <sup>2</sup> | +/- <sup>2</sup> |
| 11              | +          | +/- | +   | +/- | +/- | +  | +/- | +/- | +/- <sup>2</sup> | +/- <sup>2</sup> | +/- <sup>2</sup> | +/- <sup>2</sup> |
| 12              | +          | +/- | +   | +/- | +/- | +  | +/- | +/- | +/- <sup>2</sup> | +/- <sup>2</sup> | +/- <sup>2</sup> | +/- <sup>2</sup> |
| 13              | +          | +/- | +   | +/- | +/- | +  | +/- | +/- | <sup>3</sup>     | +/- <sup>2</sup> | +/- <sup>2</sup> | +/- <sup>2</sup> |
| 14              | +          | NS  | +/- | NS  | NS  | +  | NS  | NS  | <sup>3</sup>     | NS               | NS               | +/- <sup>2</sup> |
| 15              | +          | NS  | +/- | NS  | NS  | +  | NS  | NS  | <sup>3</sup>     | NS               | NS               | +/- <sup>2</sup> |
| 16              | +          | NS  | +/- | NS  | NS  | +  | NS  | NS  | <sup>3</sup>     | NS               | NS               | NS               |
| 17              | +          | NS  | +/- | NS  | NS  | +  | NS  | NS  | <sup>3</sup>     | NS               | NS               | NS               |
| 18              | +          | NS  | +   | NS  | NS  | +  | NS  | NS  | <sup>3</sup>     | NS               | NS               | NS               |
| 19              | +          | NS  | +   | NS  | NS  | +  | NS  | NS  | <sup>3</sup>     | NS               | NS               | NS               |
| 20              | +          |     | +/- |     |     | +  |     |     |                  |                  |                  |                  |
| 21              | +          |     |     |     |     | +  |     |     |                  |                  |                  |                  |
| 22              | +          |     |     |     |     | +  |     |     |                  |                  |                  |                  |

NS = No seaweed-mix offered.

+ = Ate all seaweed-mix

+/- = Partially ate seaweed-mix

- = Did not ate seaweed-mix

<sup>1</sup>Animals were fed restrictedly on these days.

<sup>2</sup>Animals were fed the same dose as the Low treatment, 67g dry matter of *A. taxiformis*.

<sup>3</sup>No data available due to euthanasia of animal I.
